# Supplementary material for: Gene Expression Profiling in the Injured Spinal Cord of Trachemys scripta elegans: An Amniote with Self-Repair Capabilities
Source: Front Mol Neurosci. 2017 Feb 7;10:17. doi: 10.3389/fnmol.2017.00017 (PMC5293771; doi:10.3389/fnmol.2017.00017)
Supplement: Supplementary file 3 [file Table3.XLSX]

## Sheet: Table S3
Table S3: Ontology terms overepresented in the set of under regulated gene set (A-C) and up-regulated gene set (D-G). The respective genes included in each GO term are listed. C: Cellular Component, MF Molecular Function, BP: Cellular Process
Under-expressed genes
A. Cholesterol metabolism
GO term	Ontology	Associated genes
cholesterol metabolic process	BP	SQLE, DHCR24, CYP46A1, LDLR, LSS, HMGCS1, FDFT1, CYP51A1
B. Nervous system
neuron projection	C	KBP, NEFM, GRIN1, PCDH9, PCSK2, KCNAB2, SV2A, GRIK2, KDR, NELL2, RELN, GRM3, FBXO2, KCNA2, CNTNAP4, NGEF, GRM5, PVALB, LOC101945174, PSD2, CHRM2
Synapse	C	KBP, NEFM, PHACTR1, MYO7A, GRIN1, SV2A, GRIK2, CNR1, CLSTN2, GRM3, SYT15, CNTNAP4, GRM5, SVOP, CHRM2, SNTB1
neuron part	C	KBP, NEFM, MYO7A, GRIN1, PCDH9, PCSK2, KCNAB2, SV2A, GRIK2, KDR, NELL2, RELN, GRM3, FBXO2, KCNA2, CNTNAP4, NGEF, GRM5, PVALB, LOC101945174, PSD2, CHRM2
glutamate receptor activity	MF	KBP, GRIN1, GRIK2, GRM3, GRM5
cystine:glutamate antiporter activity	MF	LOC101950217, NEBL
synaptic transmission, glutamatergic	BP	KBP, NPY2R, GRIN1, GRIK2, CNR1, RELN, GRM3, GRM5
neuron-neuron synaptic transmission	BP	KBP, NPY2R, GRIN1, GRIK2, CNR1, RELN, GRM3, CNTNAP4, GRM5
regulation of synaptic transmission, glutamatergic	BP	NPY2R, GRIK2, CNR1, RELN, GRM3, GRM5
nervous system development	BP	KBP, NEFM, MFRP, MYO7A, GRIN1, PCDH9, PCSK2, LOC101950217, SLITRK1, KDR, CNR1, SLC6A11, PTN, RELN, PRDM6, FZD10, ME2, LOC101939103, UGT8, CDH19, KCNA2, SPON2, PLP1, NGEF, GRM5, LOC101945174, CNTN6, CYP46A1, ARHGEF28, PSD2, CCDC129, CLDN11, DLL1, CHRM2, NEBL, HMGCS1, ADCY1
glutamate receptor signaling pathway	BP	KBP, GRIN1, GRIK2, RELN, GRM3, GRM5
transmission of nerve impulse	BP	KBP, NPY2R, GRIN1, KCNAB2, SV2A, GRIK2, KDR, CNR1, SLC6A11, RELN, GRM3, UGT8, KCNA2, PLP1, CNTNAP4, GRM5, LOC101945174, CLDN11, CHRM2, ADCY1
regulation of transmission of nerve impulse	BP	KBP, NPY2R, GRIN1, KCNAB2, GRIK2, KDR, CNR1, RELN, GRM3, CNTNAP4, GRM5
regulation of neuronal synaptic plasticity	BP	KBP, GRIN1, GRIK2, KDR, GRM5
C. Other GO terms of under-expressed genes
small molecule biosynthetic process	BP	XLOC_030788, HMGCLL1, SQLE, SCD, DHCR24, PSAT1, PLP1, SCD, CYP46A1, LOC101944417, LSS, HMGCS1, FDFT1, CYP51A1
single-organism biosynthetic process	BP	XLOC_030788, HMGCLL1, SQLE, SCD, DHCR24, PSAT1, PLP1, SCD, CYP46A1, LOC101944417, LSS, HMGCS1, FDFT1, CYP51A1
organic hydroxy compound metabolic process	BP	SQLE, DHCR24, PSAT1, RELN, PFKFB2, SMPD3, SULT1B1, CYP46A1, LDLR, LSS, HMGCS1, FDFT1, CYP51A1
multicellular organismal signaling	BP	KBP, NPY2R, GRIN1, KCNAB2, SV2A, GRIK2, KDR, CNR1, SLC6A11, RELN, GRM3, UGT8, KCNA2, PLP1, CNTNAP4, GRM5, LOC101945174, CLDN11, CHRM2, ADCY1
protein phosphatase inhibitor activity	MF	PHACTR1, PTN, PPP1R14C, PHACTR3, CCDC129
Over expressed genes
D. Hypoxia and reactive oxygen species
response to hydrogen peroxide	BP	DUSP1, MET, SERPINE1, JUN, KLF6, STAT1, RHOB, CASP3, ECT2, DUOX2, HGF, EZH2, ANXA1
cellular response to reactive oxygen species	BP	MET, BMP7, CD36, SERPINE1, KLF6, RHOB, ECT2, DUOX2, HGF, EZH2, ANXA1, BTK
cellular response to hypoxia	BP	LMNA, STC2, EGR1, STC1, EGLN3, BMP7, P4HB, SERPINE1, ADAM8, TP53, PTGS2, BACH1
E. Matrix remodeling
extracellular matrix	BP	MMP13, MMP3, CLU, MMP1, MMP27, MMP7, C1S, MMP9, PCOLCE2, FN1, SERPINE2, CTGF, CTHRC1, ADAMTS5, BMP7, TGFB1, SERPINE1, ANXA2, RUNX1, PLAT, MGP, S100A10, TIMP1, TIMP2, ECM1, TIMP4, COMP, LGALS1, THBS1, RARRES1, CHIA, EMILIN1, COL4A1, VWF, TNFRSF6B, POSTN, PLOD1, MMP19, TIMP1
platelet alpha granule lumen	BP	CLU, FN1, CFD, TGFB1, SERPINE1, ACTN1, THBS1, VWF
collagen binding	MF	MMP13, MMP9, PCOLCE2, FN1, CTSB, CTSL, CTSK, FN1, CTSS, PAK1, SRGN, COMP, THBS1, VWF
proteoglycan binding	MF	CTSB, PELO, CTSL, CTSK, CTSS, COMP, THBS1, PTPRC
fibronectin binding	MF	MMP13, CTGF, CTSL, CTSK, CTSS, COMP, THBS1, IGFBP3
protease binding	MF	TNFRSF1A, FN1, TNFRSF10A, SERPINE1, FN1, ADAM8, IL1R1, TIMP2, ECM1, TIMP4, VWF, CSTA, FAP
integrin binding	MF	FN1, CTGF, ADAMTS5, ITGB3, TLN1, FERMT3, ACTN1, FN1, ADAM8, THBS1, ITGA7, VWF
metalloendopeptidase activity	MF	MMP13, MMP3, PARP14, MMP1, MMP27, MMP7, MMP9, ADAMTS5, ADAM8, KEL, MMP19, FAP
extracellular matrix disassembly	BP	MMP13, MMP3, MMP1, MMP7, MMP9, FN1, CTSB, ADAMTS5, TGFB1, CTSL, CTSK, CTSS, FN1, CTSS, ADAM8, MMP19, FAP
collagen catabolic process	BP	MMP13, MMP3, MMP1, MMP7, MMP9, CTSB, CTSL, CTSK, CTSS, MMP19
cell-matrix adhesion	BP	NINJ1, FN1, VCL, CTGF, CD36, SERPINE1, ITGB3, RAC2, ACTN1, FN1, ADAM8, S100A10, RHOB, CSF1, THBS1, ITGB2, CD63, ITGA7
membrane protein ectodomain proteolysis	BP	PRKCQ, ADAM8, TIMP2, MYH9, PSTK, TIMP4, BACE2, PACSIN3
negative regulation of proteolysis	BP	SERPINE2, NRP1, SERPINE1, PLAT, TIMP1,TIMP2, TIMP4, MAD2L1, CSTA
integrin-mediated signaling pathway	BP	CTGF, ADAMTS5, ITGB3, ADAM8, TIMP2, LOC101941295, RHOB, MYH9, TIMP4, ITGB2, CD63, ITGA7, PLEK
F. Cell proliferation, apoptosis, cell differentiation
positive regulation of apoptotic process	BP	TNFRSF1A, CLU, MMP9, RIPK2, DUSP1, EGR1, GADD45A, BTG2, DNM2, TRIM35, BMP7, TGFB1, BCL2L1, TERF1, ADM, JUN, RAC2, CCL5, MELK, PHLDA2, ADAM8, JAK2, CCL5, RHOB, TP53, CASP3, MEF2C, SOX4, THBS1, FTH1, ECT2, PTGS2, IGFBP3, ANXA1
negative regulation of apoptotic process	BP	PRKCQ, TNFRSF1A, NPM1, HELLS, RIPK2, TNFAIP8, DUSP1, EGR1, ARC, SMAD1, FN1, SNAI1, BTG2, HSP90B1, FAM129B, XLOC_031631, BMP7, ANXA4, SLC46A2, SOCS3, NRP1, SERPINE1, TUBA1C, PLK1, JUN, FN1, TCLEC2D, HSPA5, ADAM8, ATAD3A, JAK2, PIM3, ANGPTL4, TIMP2, RHOB, TIMP4, COMP, CASP3, MEF2C, THBS1, MAD2L1, CXCR5, HGF, TNFRSF6B, DRAXIN, ANXA1, AURKA, ADCYAP1
cell-type specific apoptotic process	BP	PRKCQ, TNFRSF1A, NPM1, EGR1, SMAD1, BTG2, EGLN3, BMP7, BCL2L1, SLC46A2, NRP1, SERPINE1, JUN, CTSL, FAS, CCL5, TCLEC2D, ADAM8, TNFRSF21, JAK2, CCL5, ANGPTL4, RHOB, TP53, CASP3, MEF2C, THBS1, DRAXIN, ANXA1, BTK, AURKA, ADCYAP1
apoptotic signaling pathway	BP	TNFRSF1A, CLU, TRAIL, HELLS, BUB1, CTSC, LMNA, CTSG, TNFRSF10A, SNAI1, CD3E, G0S2, TGFB1, INHBA, BCL2L1, AEN, CDKN1A, NRP1, P4HB, SERPINE1, JUN, FAS, RAC2, PHLDA2, JAK2, SRGN, S100A12, TP53, CASP3, THBS1, XLOC_006132, ECT2, PTPRC, BCAP31, HGF, TNFRSF1B, BTK
positive regulation of neuron death	BP	TNFRSF1A, CLU, EGR1, JUN, CCL5, RHOB, TP53, CASP3
negative regulation of cell proliferation	BP	NPM1, TGIF1, PTPN6, CDKN2C, BTG1, SMAD1, SPRY1, SERPINE2, RBM38, SNAI1, BTG2, STAT3, TRIM35, TES, BMP7, TGFB1, INHBA, CDKN1A, IRF1, ADM, NRP1, JUN, TNFRSF21, JAK2, STAT1, IFITM3, PAK1, LOC101938179, CEBPA, TP53, CASP3, MEF2C, HMGA1, SOX4, THBS1, EMP3, SOX11, GPNMB, WDR77, PTGS2, IGFBP3, ADCYAP1
regulation of mitotic cell cycle	BP	PRKCQ, RBP5, BUB1, PTPN6, AURKA, CCNB3, DUSP1, NEK6, RBM38, TRIM35, XLOC_031631, BMP7, TGFB1, TERF1, CDKN1A, PLK1, KIF20B, TPX2, UBE2C, PIM3, EIF4E, TP53, TOM1L1, SOX4, MAD2L1, CCNA2, EZH2, ANXA1, AURKA
negative regulation of cell growth	BP	CDKN2C, BTG1, SERPINE2, BTG2, TGFB1, INHBA, CDKN1A, DCSTAMP, RRAD, NRP1, OSGIN1, TP53, LOC101950371, SEMA3A, DRAXIN
mitotic cell cycle phase transition	BP	PRKCQ, BUB1, PTPN6, AURKA, CCNB3, CDKN2C, DUSP1, NEK6, GADD45A, RBM38, DNM2, LMNB1, XLOC_031631, TGFB1, INHBA, TERF1, CDKN1A, PLK1, MELK, UBE2C, EIF4E, MCM6, TP53, PCNA, SOX4, MAD2L1, CCNA2, EZH2, ANXA1, TYMS, AURKA, BACH1
spindle assembly checkpoint	BP	BUB1, DUSP1, TERF1, PLK1, CASC5, UBE2C, MAD2L1
regulation of spindle organization	BP	AURKA, SNRPB, TPX2, AURKA
mitotic sister chromatid segregation	BP	SMC4, PLK1, NCAPH, SMC2, NDC80, MAD2L1, CAPG, CENPE
Gliogenesis	BP	CLU, C1S, LOC101932784, CDKN2C, EGR1, FN1, SERPINE2, STAT3, PELO, LOC101932514, CCL5, FN1, TNFRSF21, CCL5, RHOB, GAP43, SOX4, SOX11, EZH2, ANXA1, ADCYAP1
Positive regulation of angiogenesis	BP	TNFRSF1A, BTG1, BTG2, ADM, SERPINE1, ITGB3, RUNX1, RHOB, ECM1, THBS1, ITGB2, CHIA, PTGS2, HGF
epidermis development	BP	LOC101932784, ATP6V0D2, MYC, CTGF, SNAI1, INHBA, KEAP1, LOC101932514, DKK1, RAC2, PTGS1, KRT15, RUNX1, SOCS3, TGM3, TP53, CASP3, XLOC_006132, PTGS2, EZH2, AQP3, CSTA, PLOD1, ANXA1
connective tissue development	BP	MMP13, LOC101932784, AACS, EGR1, SMAD1, CTGF, SNAI1, BMP7, TGFB1, LOC101932514, ITGB3, ARID5A, MGP, TIMP2, CSF1, TIMP4, COMP, MEF2C, THBS1, CHIA, XLOC_006132, CHSY1, TYMS
positive regulation of osteoblast differentiation	BP	SMAD1, CTHRC1, CEBPD, BMP7, NRP1, LOC101938179, CEBPA, MEF2C, SOX11
epithelial cell migration	BP	MMP9, SEMA4A, SNAI1, MET, CORO1B, TGFB1, NRP1, SERPINE1, ITGB3, STAT1, PAK1, MYH9, THBS1, ITGB2, CD63, PTGS2, SEMA3A, FAP
embryo implantation	BP	MMP9, STC2, STC1, IRG1, ITGB3, TIMP2, TIMP4, PTGS2, VMP1
homotypic cell-cell adhesion	BP	PRKCQ, PTPN6, MEGF10, SERPINE2, BMP7, ITGB3, FERMT3, S100A12, LGALS1, PLEK
Aging	BP	PRKCQ, NPM1, CTSC, LMNA, AOC2, CTGF, TGFB1, TERF1, CDKN1A, SOCS3, ADM, SERPINE1, FOSL2, JUN, RNPEP, TIMP2, TIMP4, TP53, BP, HMGA1, ITGB2, TYMS, AURKA
tube development	BP	TGIF1, LOC101932784, ATP6V0D2, EIF3B, SMAD1, NCOR2, VPS25, SPRY1, CTGF, RBM38, MET, CTHRC1, BMP7, TGFB1, ADM, NRP1, ITGB3, KIF20B, CTSZ, MGP, STAT1, HOPX, LOC101941295, PAK1, CSF1, RDH10, EIF4E, CEBPA, FNDC3B, ETS2, BP, MEF2C, SOX4, SOX11, CHIA, COL4A1, SEMA3A, CHSY1, SPI1, PTK7, WWTR1
organ regeneration	BP	EIF4A1, TGFB1, SOCS3, ADM, LBP1, PNMT, CEBPA, CCNA2, HGF, TYMS
negative regulation of cell differentiation	BP	LOC101932784, ABCA1, CARTPT, NCOR2, SNAI1, STAT3, BMP7, TGFB1, INHBA, IRF1, NRP1, ASPM, LOC101932514, DKK1, ITGB3, CCL5, RCAN1, RUNX1, CCL5, STAT1, HOPX, RHOB, FNDC3B, SOX4, SOX11, XLOC_006132, LOC101950371, IAPP, SEMA3A, EZH2, DRAXIN, SPI1, WWTR1, TM4SF4, ADCYAP1
negative regulation of RNA metabolic process	BP	RBP5, NPM1, IRF8, HELLS, TGIF1, DEPDC1, LOC101932784, ELK3, DUSP5, IKZF1, EGR1, AICDA, NCOR2, AHR, SNAI1, STAT3, CEBPD, BMP7, RAD54L, TGFB1, ATF3, IRF1, CD36, PLK1, LOC101932514, JUN, DKK1, CCL5, HMGN2, SBNO2, CCL5, STAT1, HOPX, IFITM3, LOC101938179, CEBPA, ETS2, TP53, NFIL3, ETV6, PCNA, UHRF1, MEF2C, RASD1, HMGA1, SOX11, XLOC_006132, MTA2, EZH2, SPI1, WWTR1, AURKA, BACH1
positive regulation of gene expression	BP	TNFRSF1A, IRF8, LOC101932784, ATAD2, CREM, CYP3A7, ELK3, SNRPB, LMNA, RIPK2, IKZF1, EGR1, SMAD1, AICDA, AHR, CTGF, SNAI1, BTG2, DNM2, CREB3L1, MET, STAT3, CEBPD, BMP7, RAD54L, TGFB1, INHBA, IRF1, PTX3, SERPINE1, LOC101932514, FOSL2, JUN, ARID5A, CCL5, KLF6, CBFB, RUNX1, CNN2, CCL5, STAT1, RASL11A, CSF1, CEBPA, SLC11A1, ETS2, TP53, NFIL3, ETV6, UHRF1, MEF2C, HMGA1, SOX4, CR1L, SOX11, NFATC2, CCNA2…
negative regulation of gene expression	BP	RBP5, TNFRSF1A, IRF8, HELLS, TGIF1, DEPDC1, LOC101932784, ELK3, DUSP5, IKZF1, EGR1, SMAD1, AICDA, NCOR2, AHR, CTGF, SNAI1, STAT3, CEBPD, BMP7, RAD54L, TGFB1, ATF3, IRF1, CD36, ZC3H6, SERPINE1, PLK1, LOC101932514, JUN, DKK1, CCL5, HMGN2, SBNO2, CCL5, STAT1, HOPX, CEBPA, ETS2, TP53, NFIL3, ETV6, PCNA, UHRF1, MEF2C, RASD1, HMGA1, CR1L, SOX11, XLOC_006132, LOC101950371, MTA2, EZH2, SPI1, WWTR1, AURKA…
regulation of transcription from RNA polymerase II promoter	BP	TNFRSF1A, NCLN, IRF8, TGIF1, LOC101932784, CREM, ELK3, SNRPB, LMNA, RIPK2, IKZF1, EGR1, SMAD1, NCOR2, AHR, SNAI1, BTG2, CREB3L1, MET, STAT3, EGLN3, CEBPD, BMP7, ANXA4, RAD54L, TGFB1, INHBA, IRF1, CD36, ZC3H6, SERPINE1, PLK1, LOC101932514, FOSL2, JUN, DKK1, ARID5A, HMGN2, KLF6, CBFB, RUNX1, CCL5, STAT1, HOPX, RHOB, ENG, PAK1, CEBPA, SLC11A1, ETS2, TP53, NFIL3, ETV6, PCNA, UHRF1, MEF2C, HMGA1, SOX4…
G. Inflammation and immune response
CCR5 chemokine receptor binding	MF	JAK1, STAT3, CCL5, STAT1
complement component C4b receptor activity	MF	C4BPA, CD55, CR2
complement component C3b binding	MF	C4BPA, CD55, CR2
complement component C3b receptor activity	MF	C4BPA, CD55, CR2
complement component C4b binding	MF	C4BPA, CD55, CR2
platelet degranulation	BP	CLU, FN1, VCL, SCG3, CFD, TGFB1, CD36, SERPINE1, ITGB3, TLN1, ACTN1, FN1, HSPA5, THBS1, VWF, PLEK, FLNA
platelet activation	BP	PRKCQ, CLU, PTPN6, GNAI3, FN1, VCL, SCG3, SERPINE2, SELP, CFD, TGFB1, LBP2, CD36, SERPINE1, ITGB3, TLN1, FERMT3, RAC2, ACTN1, FN1, HSPA5, RHOB, ITPR3, THBS1, RHOG, VWF, PLEK, FLNA
leukocyte migration involved in inflammatory response	BP	AOC2, PELO, ADAM8, S100A12, SELE, ITGB2
positive regulation of alpha-beta T cell activation	BP	PRKCQ, LOC101950396, RIPK2, IKZF1, CD3E, ITPKB, IRF1, CR1L, PNP, RIPK2, PTPRC
type I interferon-mediated signaling pathway	BP	IRF8, PTPN6, JAK1, IFI35, AEN, IRF1, SOCS3, STAT1, LOC101941295, IFITM3, LOC101938179
toll-like receptor signaling pathway	BP	RIPK2, CTSB, IRG1, HSP90B1, IRF1, CD36, JUN, CTSL, CTSK, CTSS, RIPK2, PELO, MEF2C, ITGB2, TLR2, BTK
JAK-STAT cascade involved in growth hormone signaling pathway	BP	PTPN6, STAT3, SOCS3, CISH, JAK2, STAT1
positive regulation of inflammatory response	BP	TNFRSF1A, AOC2, SERPINE1, CTSS, CCL5, CTSS, ADAM8, JAK2, CCL5, S100A12, ALOX5AP, TLR2, PTGS2
positive regulation of leukocyte migration	BP	AOC2, SELP, SERPINE1, ITGB3, RAC2, CCL5, CCR2, ADAM8, CCL5, THBS1, SELE, CCR5
Fibrinolysis	BP	SERPINE1, ANXA2, PLAT, S100A10, THBS1, FAP
response to interleukin-1	BP	RIPK2, EGR1, FN1, IRG1, IRF1, SERPINE1, FN1, IL1R1, SELE, CHIA, ANXA1
positive regulation of tumor necrosis factor production	BP	CARD9, TNFRSF1A, CLU, RIPK2, CD36, CCL5, JAK2, CCL5
regulation of interferon-gamma-mediated signaling pathway	BP	PTPN6, JAK1, SOCS3, JAK2, STAT1, LOC101941295
cytokine secretion	BP	ABCA1, CHIA, ANXA4, LBP2, CD36, CIDEA, CCL5, PNP, TCLEC2D, TNFRSF21, CCL5, SRGN, CHIA, TLR2, ANXA1
Decidualization	BP	STC2, STC1, CTSB, SERPINE1, PTGS2, JUNB
cellular response to mechanical stimulus	BP	TNFRSF1A, EGR1, GADD45A, CTSB, TNFRSF10A, IRF1, SERPINE1, ITGB3, CNN2, PTGS2
positive regulation of T cell differentiation	BP	RIPK2, IKZF1, ITPKB, IRF1, PNP, ADAM8, IL1R1, CR1L, PTPRC
response to tumor necrosis factor	BP	TNFRSF1A, IRG1, DCSTAMP, IRF1, CRHBP, TNFRSF21, JAK2, STAT1, SELE, THBS1, SELE, CHIA, PTGS2, TNFRSF1B
positive regulation of MAPK cascade	BP	CARD9, SIRPA, PDE6H, RIPK2, GADD45A, FGF19, CTGF, MET, LMNB1, TREM2, TGFB1, CD36, NRP1, JUN, ITGB3, CCL5, RIPK2, ADAM8, CCL5, LOC101941295, PAK1, MEF2C, THBS1, CHIA, PTPRC, HGF, EZH2, IGFBP3, ADCYAP1
antigen processing and presentation of peptide antigen	BP	DNM2, TREM2, KIF2C, CD36, BLMH, CTSL, CTSS, TAP2, BMA1, SLC11A1, SLA, SEC61A1, IFI30, KIF4A, CENPE, B2M, BCAP31, KIF22
antigen receptor-mediated signaling pathway	BP	PRKCQ, SIRPA, PTPN6, RIPK2, CD3E, LBP2, STOML2, FYB, TNFRSF21, BMA1, PAK1, MEF2C, NFATC2, PTPRC, BTK
response to glucocorticoid stimulus	BP	DUSP1, FN1, STC1, TGFB1, TK1, SOCS3, ADM, SERPINE1, PLAT, MGP, RHOB, CEBPA, PTGS2, JUNB, GPR83-L, ANXA1, TYMS, ADCYAP1
response to ionizing radiation	BP	EGR1, AICDA, GADD45A, SNAI1, ERCC6L, RAD54L, AEN, CDKN1A, SOCS3, RHOB, TP53, ECT2, PTPRC, ANXA1
complement receptor mediated signaling pathway	BP	C4BPA, CD55, CR2, CR1L
cellular response to interleukin-4	BP	DCSTAMP, KEAP1, TUBA1C, HSPA5, NFIL3, RPS2, CORO1A
negative regulation of complement activation, classical pathway	BP	C4BPA, CD55, CR2
negative regulation of complement activation, alternative pathway	BP	C4BPA, CD55, CR2
leukotriene production involved in inflammatory response	BP	SERPINE1, ALOX5AP, ALOX5
defense response to Gram-negative bacterium	BP	SIRPA, LYZ, C4BPA, SERPINE1, CD55, SLC11A1, CR1L
response to virus	BP	CARD9, CLU, DHX58, AICDA, AEN, IRF1, CR1L, RAC2, CCL5, TCLEC2D, CCL5, STAT1, IFITM3, LOC101938179, MEF2C, HMGA1, PTPRC, DUOX2, ODC1, UNC13D, IFNAR1
chitin catabolic process	BP	CHIA, CHIA, CHIT1, WDR77
positive regulation of chemotaxis	BP	FN1, SNAI1, MET, TGFB1, NRP1, SERPINE1, CCR2, CCL5, THBS1, CCR5
B cell differentiation	BP	PTPN6, IKZF1, INHBA, CD55, KLF6, LGALS1, XLOC_029991, CR1L, PTPRC, BTK
lymphocyte activation involved in immune response	BP	SEMA4A, RIPK2, TGFB1, IRF1, LBP1, SLC11A1, LGALS1, CR1L, PTPRC, UNC13D
macrophage differentiation	BP	MMP9, PELO, INHBA, CSF1, CEBPA, SPI1
regulation of alpha-beta T cell proliferation	BP	RIPK2, CD3E, IRF1, CR1L, PTPRC
leukocyte tethering or rolling	BP	SELP, SELE, GCNT1
positive regulation of lymphocyte proliferation	BP	PRKCQ, SIRPA, RIPK2, CD3E, CR1L, PNP, RIPK2, MEF2C, CR1L, NFATC2, PTPRC, CORO1A
macrophage derived foam cell differentiation	BP	ABCA1, TGFB1, CD36, ITGB3, CSF1, SOAT1
regulation of B cell proliferation	BP	SIRPA, AHR, TNFRSF21, CASP3, MEF2C, NFATC2, PTPRC
regulation of I-kappaB kinase/NF-kappaB cascade	BP	PRKCQ, CARD9, TNFRSF1A, RIPK2, NEK6, TNFRSF10A, TSPAN6, BMP7, CD36, STAT1, RHOB, ECM1, S100A12, LGALS1, TLR2, ECT2, PTGS2, FLNA
response to interferon-beta	BP	IRG1, IRF1, STAT1, IFITM3, LOC101938179
positive regulation of monocyte differentiation	BP	DCSTAMP, JUN, CSF1
mast cell activation	BP	LBP2, STXBP2, FYB, SERPINE1, PVRL2, UNC13D, BTK
leukocyte homeostasis	BP	TGFB1, SLC46A2, FAS, RAC2, CASP3, MEF2C, ANXA1, CORO1A
leukotriene biosynthetic process	BP	GGT5, RNPEP, ALOX5AP, ALOX5
																					RHOB	ITPR3	THBS1	RHOG	VWF	PLEK	FLNA
																					MEF2C	THBS1	CHIA	PTPRC	HGF	EZH2	IGFBP3	ADCYAP1
